# Supplementary material for: Integrated profiling of human pancreatic cancer organoids reveals chromatin accessibility features associated with drug sensitivity
Source: PubMed Central journal article supplement (PMC9023604; doi:10.1038/s41467-022-29857-6), 2022-04-21
Supplement: 41467_2022_29857_MOESM1_ESM.pdf [file 41467_2022_29857_MOESM1_ESM.pdf]

## Supplementary Figure. 1

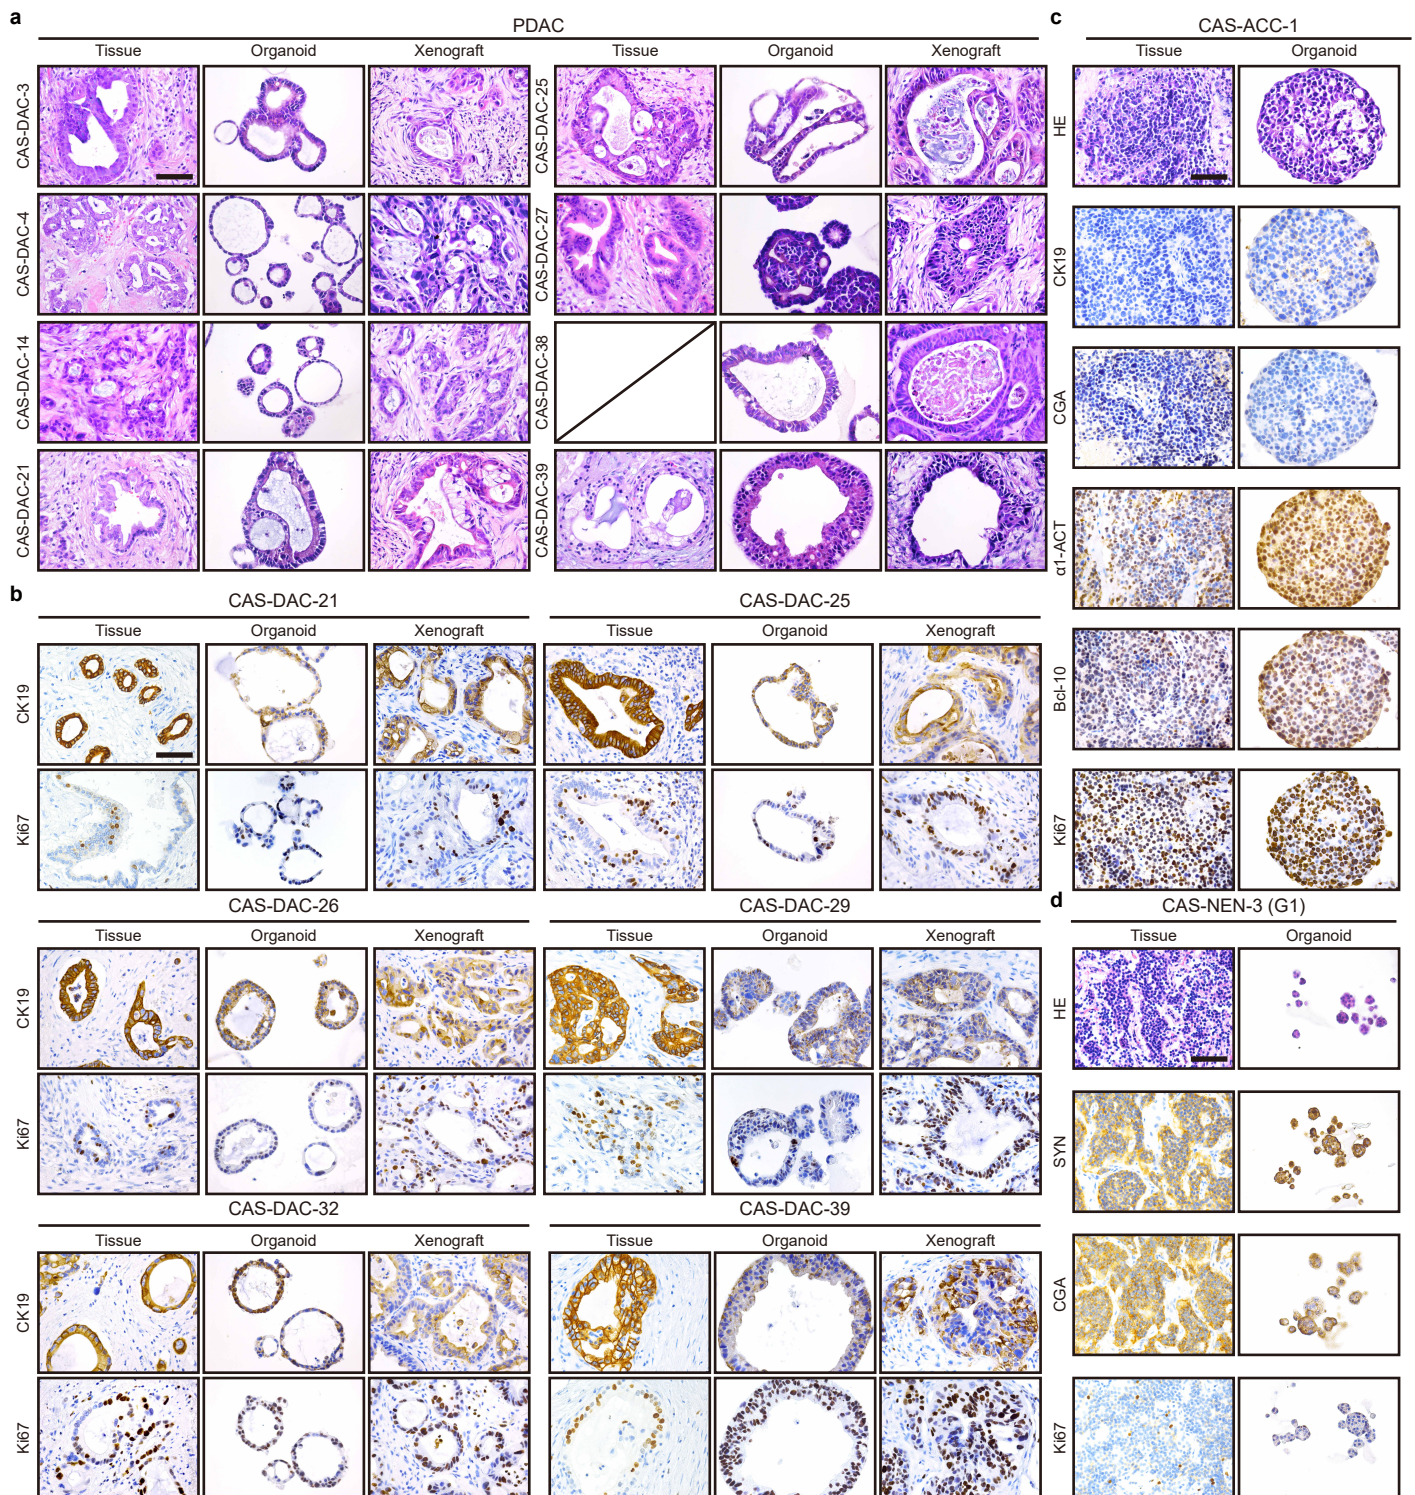

**Supplementary Figure. 1 | Representative images of histological examination of PDPCOs. a,** Representative H&E staining of PDAC primary tumors, organoids, and xenografts. Scale bar, 50  $\mu$ m. Experiments are repeated at least three times with similar results. **b,** Representative CK19 and Ki67 staining of PDAC primary tissues, organoids and xenografts. Scale bar, 50  $\mu$ m. Experiments are repeated at least three times with similar results. **c,** Representative H&E, CK19, CHGA,  $\alpha$ 1-ACT, Bcl-10 and Ki67 staining of an ACC primary tissue and organoid. Scale bar, 50  $\mu$ m. Experiments are repeated at least three times with similar results. **d,** Representative H&E, SYP, CHGA and Ki67 staining of a NEN primary tissue and organoid. CAS-NEN-3 was clinically diagnosed as WHO grade G1. Scale bar, 50  $\mu$ m. Experiments are repeated at least three times with similar results. PDPCO, patient-derived pancreatic cancer organoid; PDAC, pancreatic ductal adenocarcinoma; NEN, pancreatic neuroendocrine neoplasm; ACC, acinar cell carcinoma.

## Supplementary Figure. 2

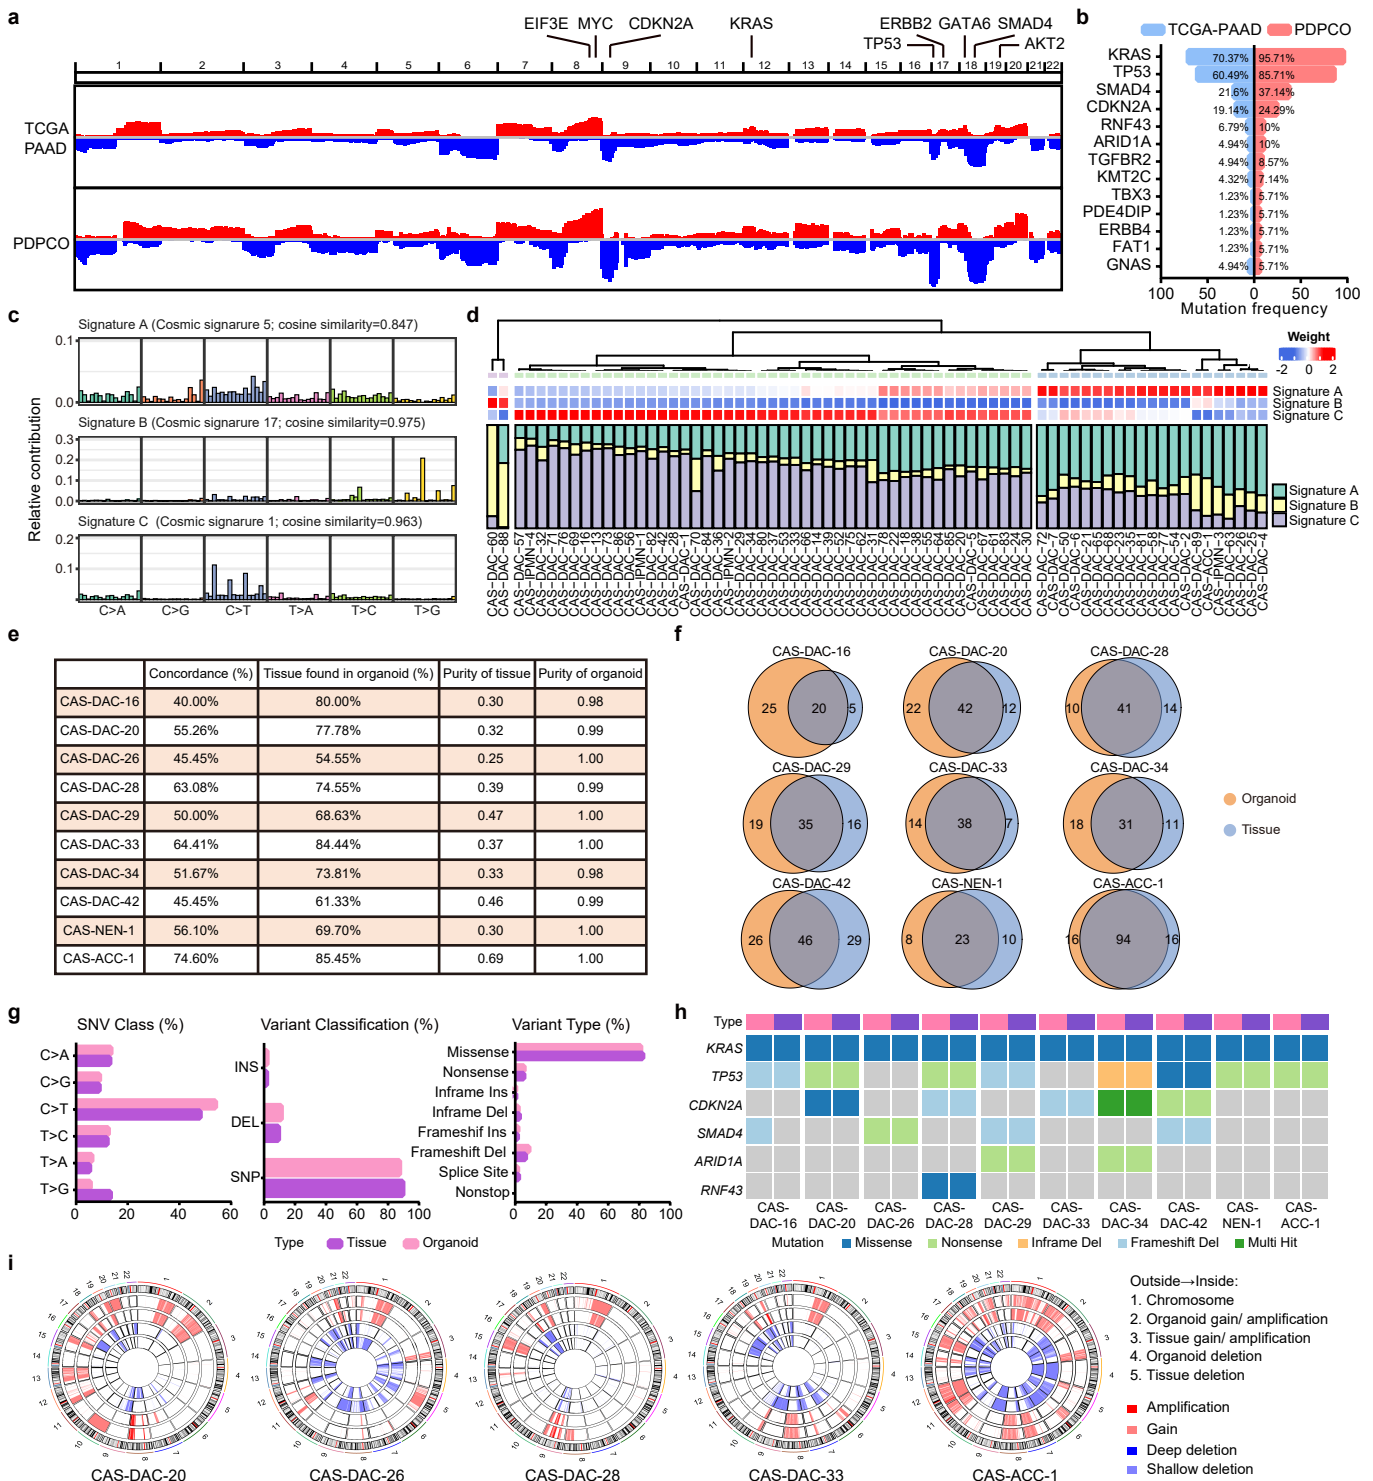

**Supplementary Figure. 2 | Comparison of genomic alterations among exocrine PDPCOs.** **a**, Chromosomal changes in the TCGA PAAD cohort (top) and 70 exocrine PDPCOs (bottom) visualized with Integrated Genomics Viewer. The percentage of PDPCOs with  $\log_2(\text{copy number}/2) > 0.1$  is shown in red, and the percentage of PDPCOs with  $\log_2(\text{copy number}/2) < -0.1$  is shown in blue. **b**, Comparison of the detailed mutation frequency of common pancreatic cancer-related genes between TCGA PAAD dataset and our PDPCOs. **c**, Mutational signatures identified by the NMF method in the 70 exocrine PDPCOs. **d**, Mutational signature-based clustering of the 70 exocrine PDPCOs. Heatmap and barplot show relative contribution of three NMF mutational signatures in each sample. **e**, Purity, concordance and percent of the primary tumor mutations found in the organoid cultures among exon regions of 10 paired exocrine PDPCOs (WGS) and original tissues (WES). **f**, Representative Venn diagrams are shown of 9 paired exocrine PDPCOs and original tissues based on mutations in exon regions. **g**, Distribution of variation within the coding region of 10 paired exocrine PDPCOs and original tissues. The proportions of SNV class (left), variant classification (middle) and variant type (right) are shown. **h**, Mutation profile of the six top mutated pancreatic cancer-related genes in 10 paired exocrine PDPCOs and original tissues. **i**, Circos plot showing the comparison of copy number variants in 5 paired exocrine PDPCOs and tissues. PDPCO, patient-derived pancreatic cancer organoid; NMF, nonnegative matrix factorization.



## Supplementary Figure. 3

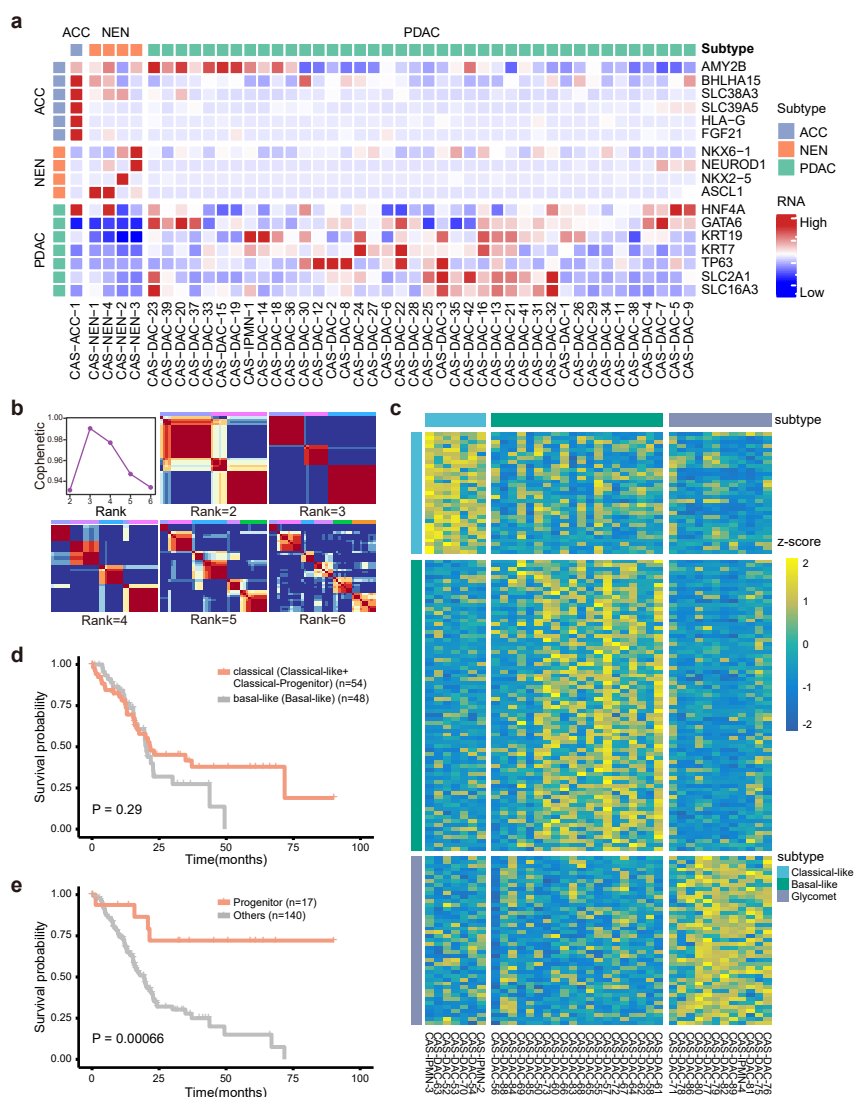

**Supplementary Figure. 3 | Transcriptome-based classification of exocrine PDPCOs and validation in the internal cohort. a**, Heatmap showing the expression of representative genes of acinar cell, neuroendocrine cell and PDAC in the 45 PDPCOs (39 CAS-DACs, 1 CAS-IPMN, 1 CAS-ACC and 4 CAS-NENs). **b**, Detailed data from unsupervised NMF clustering in the discovery cohort of 40 exocrine PDPCOs (39 CAS-DACs and 1 CAS-IPMN). Solutions are shown for classes  $k = 2$  to  $k = 6$ . **c**, Validation of the transcriptomic subtypes in an internal cohort of 39 exocrine PDPCOs (36 CAS-DACs and 3 CAS-IPMNs). Samples are listed in rows, and signature genes are listed in columns as z-scores. **d**, Kaplan-Meier survival analysis showing the overall survival outcomes of patients with the classical (classical-like and classical-progenitor) and basal-like (basal-like) subtypes, as identified in Fig. 3f. P value is determined by using log-rank test. **e**, Kaplan-Meier survival analysis showing the overall survival outcomes of patients with the classical-progenitor and other (classical-like, basal-like and glycomet) subtypes, as identified in Fig. 3f. P value is determined by using log-rank test. PDPCO, patient-derived pancreatic cancer organoid; PDAC, pancreatic ductal adenocarcinoma. NEN, pancreatic neuroendocrine neoplasm; ACC, acinar cell carcinoma.

## Supplementary Figure. 4

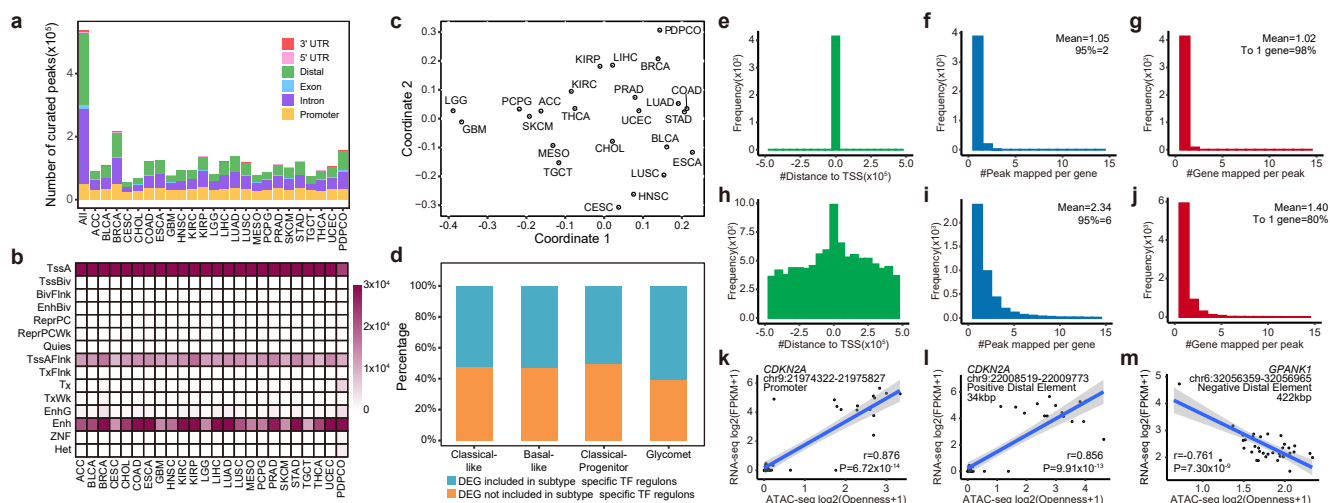

**Supplementary Figure. 4 | Comparison of ATAC-seq data from PDPCOs with data from a previous pancancer study and characterization of putative peak-to-gene links.** **a**, Reproducible peaks from ATAC-seq of 45 PDPCOs (41 exocrine and 4 neuroendocrine PDPCOs) and a pancancer dataset. Types of genomic regions with ATAC-seq peaks are labeled with different colors. **b**, Heatmap showing the enrichment of ATAC-seq peaks within ChIP-seq-defined chromHMM states from the Roadmap Epigenomics Project in above PDPCOs and pancancer dataset. Cancer types are shown at bottom. ChIP-seq-defined chromHMM states are shown at left. **c**, Principal coordinates analysis of reproducible peaks in above PDPCOs and pancancer dataset. Each dot represents a single cancer type. Cancer types are shown at bottom. **d**, Bar plot showing the proportion of DEGs covered by enriched TF regulons in each transcriptomic subtype. **e**, Distribution of the distance from each peak to the transcription start site of linked gene among promoter-to-gene links. Distribution of the number of peaks linked per gene in **f** and genes linked per peak in **g** among promoter-to-gene links. **h**, Distribution of the distance from each peak to the transcription start site of linked gene among distal peak-to-gene links. Distribution of the number of peaks linked per gene in **i** and genes linked per peak in **j** among distal peak-to-gene links. Dot plot of a representative promoter-to-gene link in **k**, a representative positive distal peak-to-gene link in **l**, a representative negative distal peak-to-gene link in **m**. Each dot represents an individual sample. P values associated with Pearson's correlation coefficients were adjusted for multiple testing using FDR. PDPCO, patient-derived pancreatic cancer organoid; DEG, differentially expressed gene. ACC, adrenocortical carcinoma; BLCA, bladder urothelial carcinoma; BRCA, breast invasive carcinoma; CESC, cervical squamous cell carcinoma; CHOL, cholangiocarcinoma; COAD, colon adenocarcinoma; ESCA, esophageal carcinoma; GBM, glioblastoma multiforme; HNSC, head and neck squamous cell carcinoma; KIRC, kidney renal clear cell carcinoma; KIRP, kidney renal papillary cell carcinoma; LGG, low-grade glioma; LIHC, liver hepatocellular carcinoma; LUAD, lung adenocarcinoma; LUSC, lung squamous cell carcinoma; MESO, mesothelioma; PCPG, pheochromocytoma and paraganglioma; PRAD, prostate adenocarcinoma; SKCM, skin cutaneous melanoma; STAD, stomach adenocarcinoma; TGCT, testicular germ cell tumors; THCA, thyroid carcinoma; UCEC, uterine corpus endometrial carcinoma. TssA, active TSS; TssBiv, bivalent/poised TSS; EnhBiv, bivalent enhancer; ReprPC, repressed polycomb; ReprPCWk, weak repressed polycomb; Quies, quiescent/low; TssAFlnk, flanking active TSS; TxFlnk, transcription at the 5' and 3' ends of genes; Tx, strong transcription; TxWk, weak transcription; EnhG, genic enhancer; Enh, enhancer; ZNF/Rpts, ZNF genes and repeats; Het, heterochromatin.



# Supplementary Figure. 5

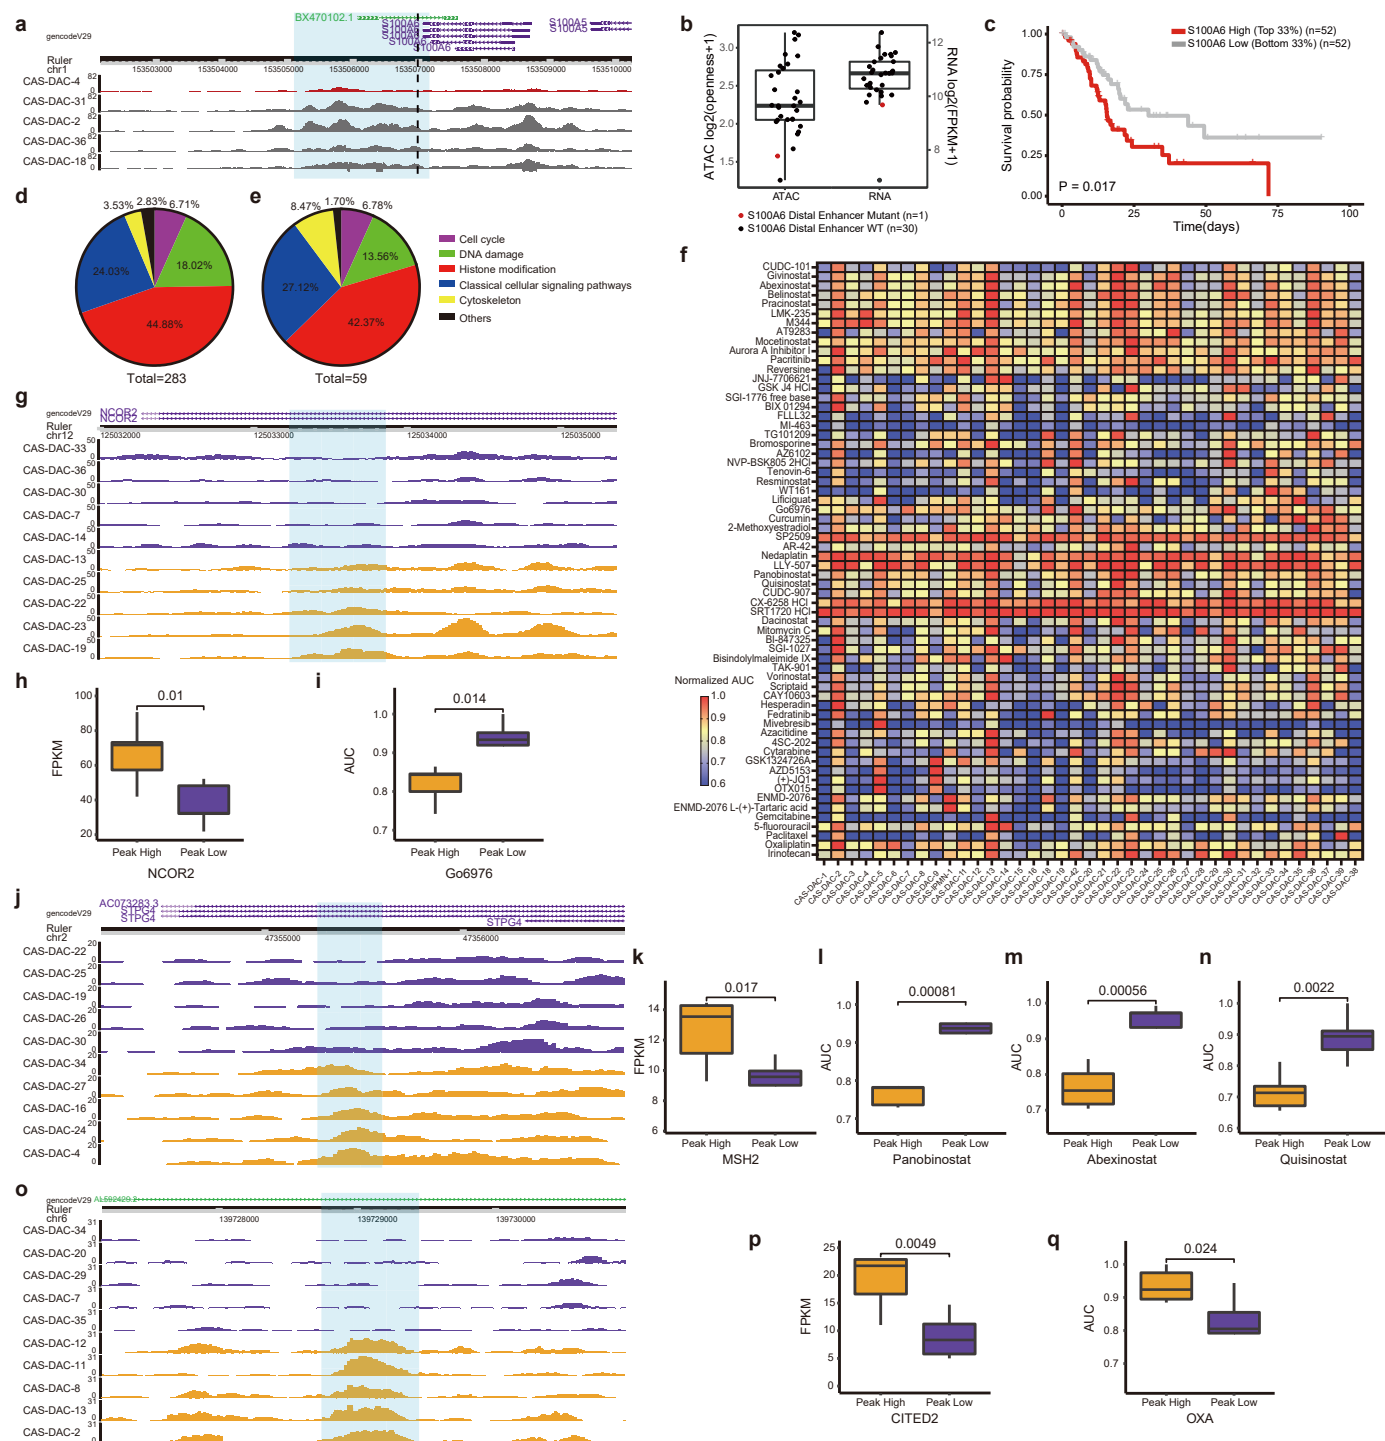

Supplementary Figure. 5 | See next page for caption.

**Supplementary Figure. 5 | Integrated analysis of noncoding mutations and drug sensitivity in PDPCOs.** **a**, Normalized ATAC-seq tracks of *S100A6* putative enhancer locus in 5 representative samples. The red and gray tracks represent samples with and without mutation of *S100A6* putative enhancer, respectively. Black dotted line indicates the position of mutation, and the predicted enhancer region is highlighted by light blue shading. **b**, Box plot showing chromatin accessibility at *S100A6* putative enhancer and *S100A6* gene expression across 31 exocrine PDPCOs. Boxplot show the median (central line), the 25–75% interquartile range (box limits). **c**, Kaplan-Meier analysis of overall survival in TCGA PAAD cohort stratified by high and low expression of *S100A6* gene. P value is determined by using log-rank test. **d**, Pie charts showing pathway classification of 283 chemicals used for primary high-throughput drug screening. **e**, Pie charts showing pathway classification of 59 chemicals used for secondary high-throughput drug screening. **f**, Heatmap of secondary high-throughput drug screening results showing AUC values of 59 chemicals and 5 chemotherapeutic agents in 39 exocrine PDPCOs. **g**, Normalized ATAC-seq tracks of *NCOR2* putative enhancer locus in 10 representative samples. The yellow and blue tracks represent samples with and without peaks in *NCOR2* putative enhancer, respectively. The peak region is highlighted by light blue shading. Comparison between peak high group with peaks in *NCOR2* putative enhancer and peak low group without such peaks in above 10 samples of *NCOR2* gene expression in **h** and AUC of Go6976 in **i**. Each group contains 5 biologically independent samples. Boxplot show the median (central line), the 25–75% interquartile range (box limits). Significance is computed by two-sided unpaired *t* test. **j**, Normalized ATAC-seq tracks of *MSH2* putative enhancer locus in 10 representative samples. The yellow and blue tracks represent samples with and without peaks in *MSH2* putative enhancer, respectively. The peak region is highlighted by light blue shading. Comparison between peak high group with peaks in *MSH2* putative enhancer and peak low group without such peaks in above 10 samples of *MSH2* gene expression in **k**, AUC of panobinostat in **l**, AUC of abexinostat in **m**, and AUC of quisinostat in **n**. Each group contains 5 biologically independent samples. Boxplot show the median (central line), the 25–75% interquartile range (box limits). Significance is computed by two-sided unpaired *t* test. **o**, Normalized ATAC-seq tracks of *CITED2* putative enhancer locus in 10 representative samples. The yellow and blue tracks represent the samples with and without peaks in *CITED2* putative enhancers, respectively. The peak region is highlighted by light blue shading. Comparison between peak high group with peaks in *CITED2* putative enhancer and peak low group without such peaks in above 10 samples of *CITED2* gene expression in **p** and AUC of OXA in **q**. Boxplot show the median (central line), the 25–75% interquartile range (box limits). Significance is computed by two-sided unpaired *t* test. PDPCO, patient-derived pancreatic cancer organoid; AUC, area under curve; OXA, oxaliplatin.

## Supplementary Figure. 6

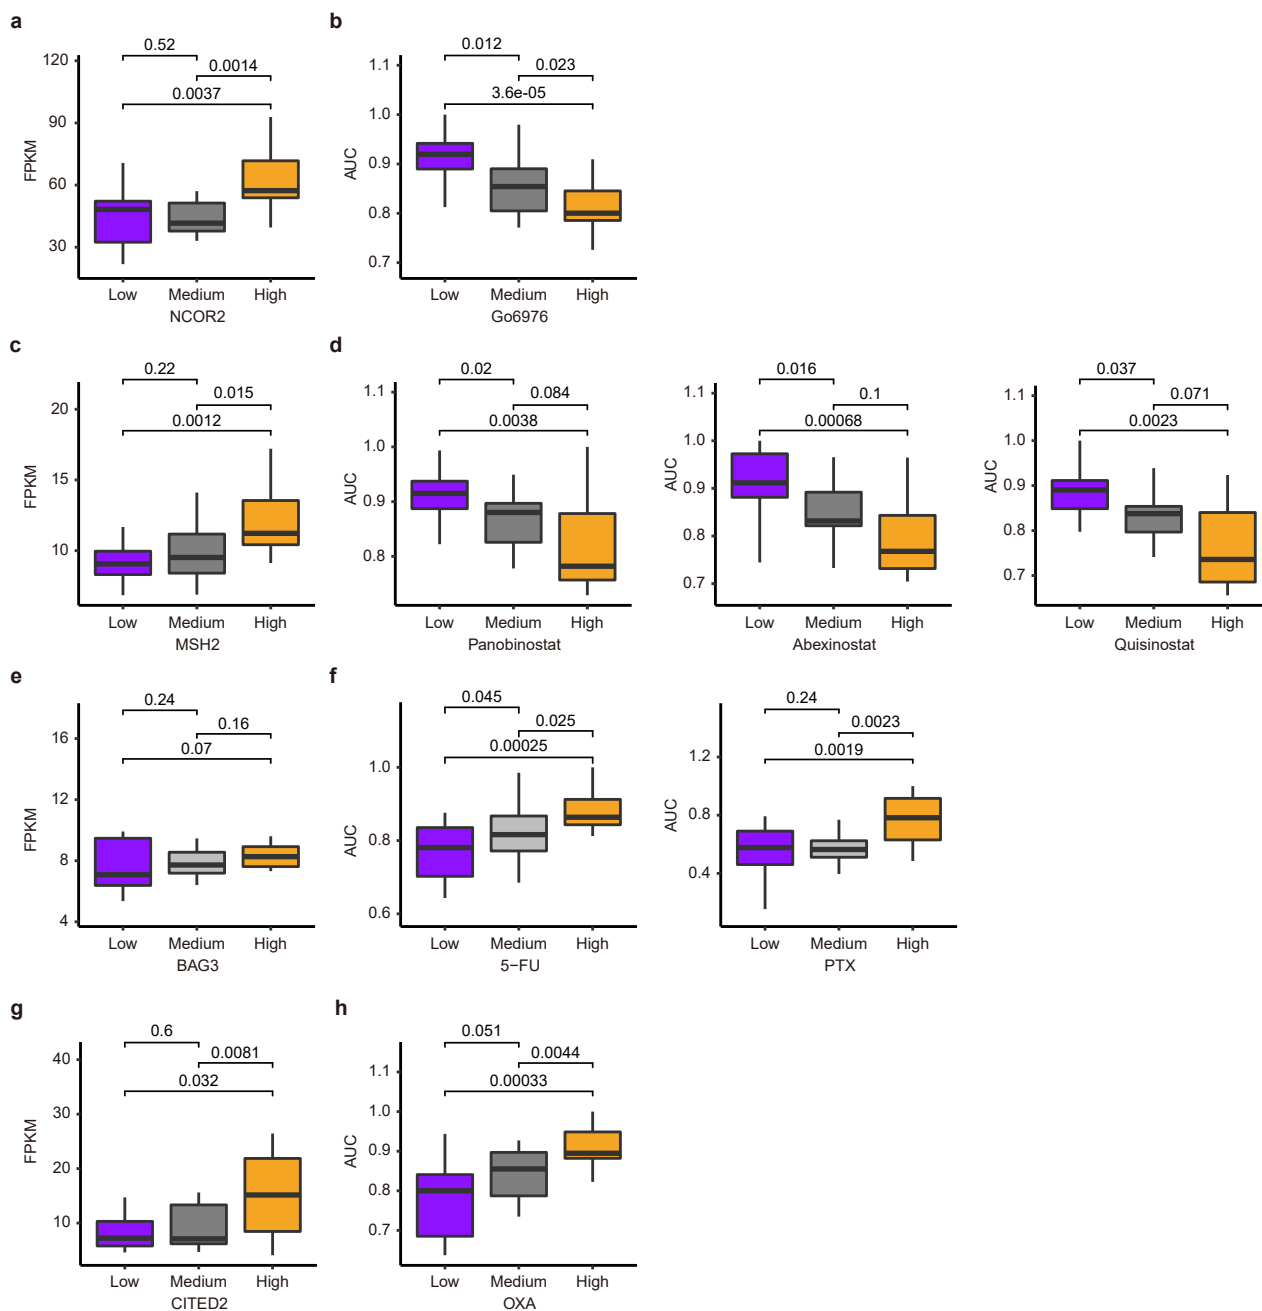

**Supplementary Figure. 6 | Comparison of gene expression and drug sensitivity based on tertiles of ATAC-seq peak openness over all samples.** Stratifying the openness of ATAC-peak at chr12:125033345-125034019 into tertiles over all samples (low, medium and high) to compare the expression of *NCOR2* gene in **a**, and the drug sensitivity of Go6976 in **b**. Boxplot show the median (central line), the 25–75% interquartile range (box limits). Significance is computed by two-sided unpaired *t* test. Stratifying the openness of ATAC-peak at chr2:47355361-47355625 into tertiles over all samples (low, medium and high) to compare the expression of *MSH2* gene in **c**, and the drug sensitivity of panobinostat, abexinostat and quisinostat in **d**. Boxplot show the median (central line), the 25–75% interquartile range (box limits). Significance is computed by two-sided unpaired *t* test. Stratifying the openness of ATAC-peak at chr10:121441617-121442244 into tertiles over all samples (low, medium and high) to compare the expression of *BAG3* gene in **e**, and the drug sensitivity of 5-FU and PTX in **f**. Boxplot show the median (central line), the 25–75% interquartile range (box limits). Significance is computed by two-sided unpaired *t* test. Stratifying the openness of ATAC-peak at chr6:139728666-139729424 into tertiles over all samples (low, medium and high) to compare the expression of *CITED2* gene in **g**, and the drug sensitivity of OXA in **h**. Boxplot show the median (central line), the 25–75% interquartile range (box limits). Significance is computed by two-sided unpaired *t* test. 5-FU, 5-fluorouracil; PTX, paclitaxel.



## Supplementary Figure. 7

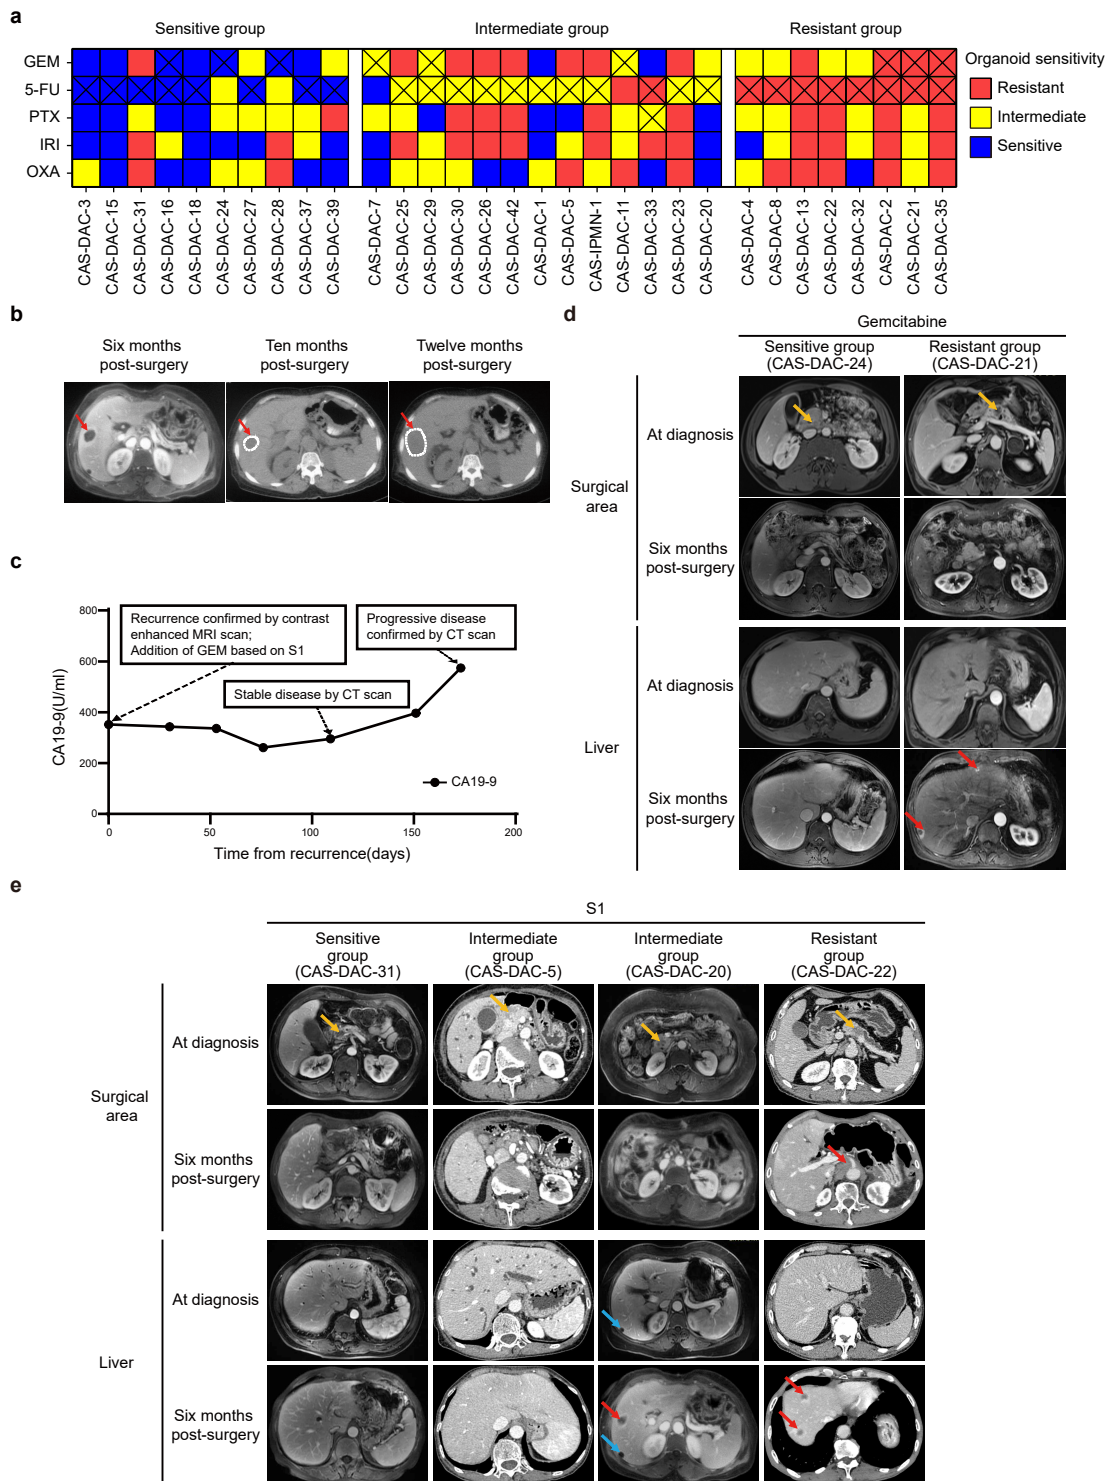

**Supplementary Figure. 7 | Clinically relevant chemosensitivity of PDPCOs.** **a**, Graphical summary of group definition and chemotherapy administration in 31 patients who underwent upfront radical surgery with subsequent adjuvant therapy. Symbol X indicated the chemotherapy agents used in clinical practice of corresponding patients. **b**, Radiation examination of the liver of patient CAS-DAC-20 at six months post surgery (CE-MRI), ten months post surgery (CT) and twelve months post surgery (CT). Red arrow, metastasis. **c**, Curve showing the levels of the tumor marker CA19-9 in patient CAS-DAC-20 after the confirmation of recurrence. Source data are provided as a Source Data file. **d**, Radiation examination of both surgical area and liver at the time of diagnosis and six months post-surgery in patients (CAS-DAC-24, CE-MRI; CAS-DAC-21, CE-MRI) treated with gemcitabine from different sensitivity group. Yellow arrow, primary tumor; Red arrow, metastasis or local recurrence. **e**, Radiation examination of both surgical area and liver at the time of diagnosis and six months post-surgery in patients (CAS-DAC-31, CE-MRI; CAS-DAC-5, CE-CT; CAS-DAC-20, CE-MRI; CAS-DAC-22, CE-CT) treated with S1 from different sensitivity group. Yellow arrow, primary tumor; Red arrow, metastasis or local recurrence. S1 exhibits the same mode of action as 5-FU *in vivo*. PDPCO, patient-derived pancreatic cancer organoid; GEM, gemcitabine; 5-FU, 5-fluorouracil; PTX, paclitaxel; OXA, oxaliplatin; IRI, irinotecan; CE-MRI: contrast-enhanced magnetic resonance imaging; CT: computed tomography; CE-CT: contrast-enhanced computed tomography.

## Supplementary Figure. 8

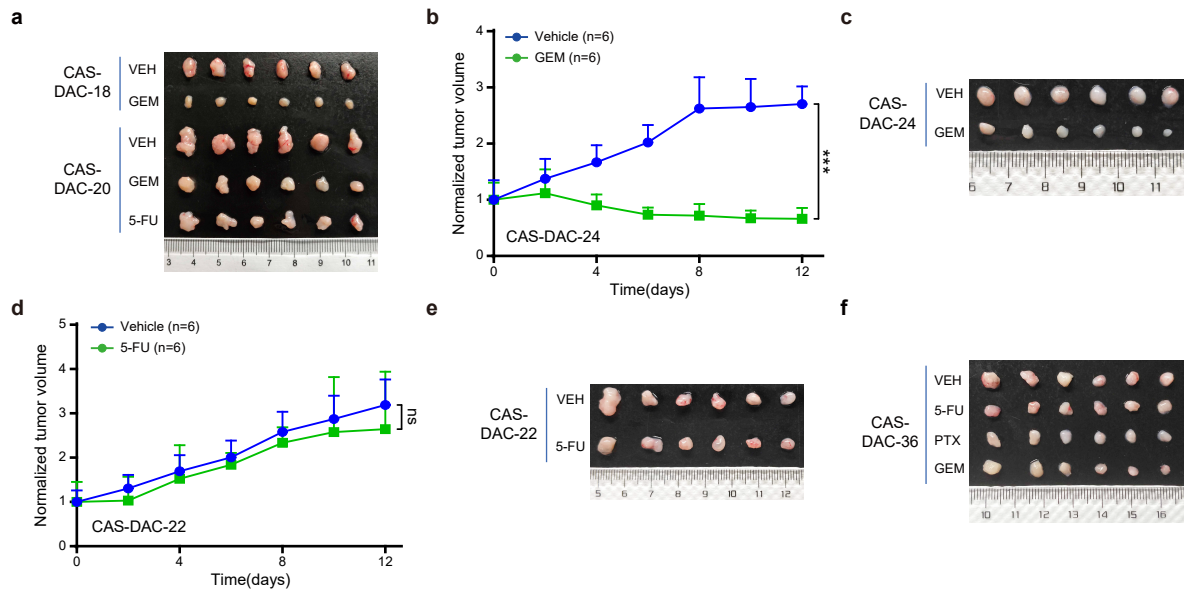

**Supplementary Figure. 8 | Validation of clinically relevant chemosensitivity of PDPCOs by in vivo xenograft models.** **a**, Top: Isolated ODX-18 tumor treated with Vehicle (n=6) and GEM (n=6). Bottom: Isolated ODX-20 tumor treated with Vehicle (n=6), GEM (n=6) and 5-FU (n=6). **b**, Drug test of ODX-24 with GEM (n=6), using Vehicle as a control (n=6). Data are presented as mean values + SEM. Statistical Significance was computed by two-sided unpaired *t* test. Source data are provided as a Source Data file. **c**, Isolated ODX-24 tumor treated with Vehicle (n=6) and GEM (n=6). **d**, Drug test of ODX-22 with 5-FU (n=6), using Vehicle as a control (n=6). Data are presented as mean values + SEM. Statistical Significance was computed by two-sided unpaired *t* test. Source data are provided as a Source Data file. **e**, Isolated ODX-22 tumor treated with Vehicle (n=6) and 5-FU (n=6). **f**, Isolated ODX-36 tumor treated with Vehicle (n=6), 5-FU (n=6), PTX (n=6) and GEM (n=6). Statistical analysis, ns  $P \geq 0.05$ , \*  $P < 0.05$ , \*\*  $P < 0.01$ , \*\*\*  $P < 0.001$ . PDPCO, patient-derived pancreatic cancer organoid; GEM, gemcitabine; 5-FU, 5-fluorouracil; PTX, paclitaxel; VEH, vehicle.

## Supplementary Figure. 9

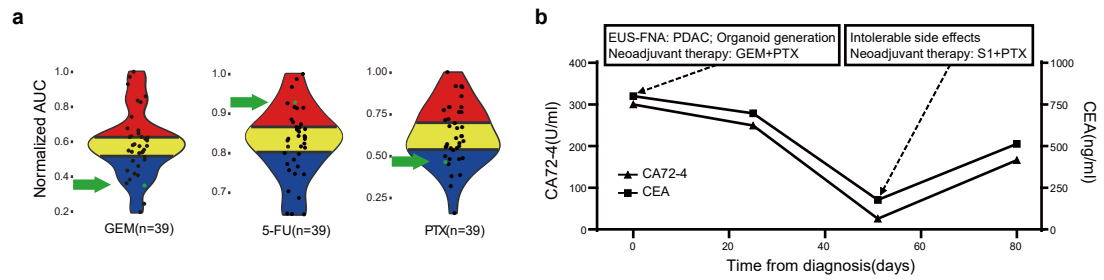

**Supplementary Figure. 9 | Clinically relevant chemosensitivity of PDPCOs in neoadjuvant therapy setting. a.** Chemosensitivity of organoid CAS-DAC-38 (green dot indicated by the green arrow) to GEM, 5-FU and PTX. **b.** Curves showing the levels of the tumor markers CA72-4 and CEA in patient CAS-DAC-38 after pathological diagnosis of PDAC by EUS-FNA. S1 exhibits the same mode of action as 5-FU *in vivo*. Source data are provided as a Source Data file. PDPCO, patient-derived pancreatic cancer organoid; GEM, gemcitabine; 5-FU, 5-fluorouracil; PTX, paclitaxel; EUS-FNA, endoscopic ultrasound-guided fine needle aspiration biopsy.
