# Supplementary material for: Integrated profiling of human pancreatic cancer organoids reveals chromatin accessibility features associated with drug sensitivity
Source: PubMed Central journal article supplement (PMC9023604; doi:10.1038/s41467-022-29857-6), 2022-04-21
Supplement: 41467_2022_29857_MOESM3_ESM.pdf [file 41467_2022_29857_MOESM3_ESM.pdf]

## **Description of Additional Supplementary Files**

File Name: Supplementary Data 1

Description: Clinicopathologic variables and sample sequencing for the PDPCO biobank.

File Name: Supplementary Data 2

Description: Coding and noncoding mutations in the 69 exocrine PDPCOs with paired organoid and blood WGS.

File Name: Supplementary Data 3

Description: DEGs of four transcriptomic subtypes in the 40 exocrine PDPCOs and DEGs of validated subtypes in the 39 exocrine PDPCOs.

File Name: Supplementary Data 4

Description: The 283 TF regulons available for motif enrichment analysis and the enriched TF regulons in NEN as well as PDAC subtypes among 45 PDPCOs.

File Name: Supplementary Data 5

Description: Prediction of links between ATAC-seq peak and targeted gene expression in the 41 exocrine PDPCOs.

File Name: Supplementary Data 6

Description: Noncoding mutations within ATAC-seq peaks among the 31 exocrine PDPCOs.

File Name: Supplementary Data 7

Description: Chemicals and chemotherapy used in primary and secondary high throughput drug screening in the exocrine PDPCOs.

File Name: Supplementary Data 8

Description: Normalized AUC of drug screening in 39 exocrine PDPCOs with 59 chemical and 5 chemotherapeutic drugs.

File Name: Supplementary Data 9

Description: Prediction of links between ATAC-seq peak and drug sensitivity in the 39 exocrine PDPCOs.

File Name: Supplementary Data 10

Description: Clinical follow-up data for the 39 matched patients from the prospective database of Changhai Hospital.

File Name: Supplementary Data 11

Description: Detailed information of chemicals, peptides, and recombinant proteins involved in this study.
